# Supplementary material for: The reactivity of N-vinylcarbazole in RAFT polymerization: trithiocarbonates deliver optimal control for the synthesis of homopolymers and block copolymers
Source: Royal Society of Chemistry journal article supplement (doi:10.1039/c3py00487b), 2013-01-01

## Supplementary information

### Preparation of poly(*N*-vinylcarbazole) using RAFT agents 3-8 at 60 °C. – target molar mass 13750

A stock solution containing a RAFT agent (**3-8**) (0.154 mmol, see Table S1 for amounts), NVC (2.12 g, 10.94 mmol), AIBN (8.3 mg, 0.051 mmol) and 1,4-dioxane to a volume of 5 mL was prepared in a volumetric flask. The reaction mixture was divided in four and transferred to ampules which were degassed by three repeated freeze–evacuate–thaw cycles and sealed. The ampules were heated at 60 °C for 2, 4, 6, or 16 h (see entries 1-6, Table S2)

**Table S1.** Amount (mg) of RAFT agent used in NVC polymerization

| RAFT agent | Z                                | R                      | Amount (mg) |
|------------|----------------------------------|------------------------|-------------|
| <b>3</b>   | SC <sub>12</sub> H <sub>25</sub> | CH <sub>2</sub> CN     | 48.9        |
| <b>4</b>   | SC <sub>12</sub> H <sub>25</sub> | CH(CH <sub>3</sub> )Ph | 58.9        |
| <b>5</b>   | N-(4-Py)(4-CNPh)                 | CH <sub>2</sub> CN     | 47.8        |
| <b>6</b>   | N(4-Py)(CH <sub>3</sub> )        | CH <sub>2</sub> CN     | 34.4        |
| <b>7</b>   | OC <sub>2</sub> H <sub>5</sub>   | CH <sub>2</sub> CN     | 24.8        |
| <b>8</b>   | OC <sub>2</sub> H <sub>5</sub>   | CH(CH <sub>3</sub> )Ph | 34.8        |

### Preparation of poly(*N*-vinylcarbazole) using RAFT agent 9 at 60 °C. – target molar mass 27000

A stock solution containing RAFT agent (**9**) (16.2 mg, 0.077 mmol), NVC (2.12 g, 10.94 mmol), AIBN (8.3 mg, 0.051 mmol) and 1,4-dioxane to a volume of 5 mL was prepared in a volumetric flask. The reaction mixture was divided in three and transferred to ampules which were degassed by three repeated freeze–evacuate–thaw cycles and sealed. The ampules were heated at 60 °C for 2, 6 or 20 h (see entry 7, Table S2)

**Table S2.** Details of PNVC polymerization<sup>a</sup>

| Entry | RAFT agent | Time (h) | Conversion (%) | $M_n^a$ | $M_n$ (calc) <sup>b</sup> | $M_w/M_n^a$       |
|-------|------------|----------|----------------|---------|---------------------------|-------------------|
| 1     | 3          | 2        | 6              | 2390    | 1140                      | 1.05              |
|       |            | 4        | 37             | 6360    | 5350                      | 1.08              |
|       |            | 6        | 60             | 8900    | 8450                      | 1.09              |
|       |            | 16       | 92             | 11500   | 12600                     | 1.11              |
| 2     | 4          | 2        | 0              | 1060    | 380                       | 1.00              |
|       |            | 4        | 1              | 1110    | 520                       | 1.00 <sup>f</sup> |
|       |            | 6        | 1              | 1100    | 520                       | 1.00              |
|       |            | 16       | 61             | 9420    | 8500                      | 1.10              |
| 3     | 5          | 2        | 1              | 1540    | 450                       | 1.02              |
|       |            | 4        | 2              | 1790    | 580                       | 1.03              |
|       |            | 6        | 8              | 2890    | 1400                      | 1.08              |
|       |            | 16       | 74             | 11200   | 10200                     | 1.10              |
| 4     | 6          | 2        | 6              | 3320    | 1040                      | 1.17              |
|       |            | 4        | 37             | 6240    | 5260                      | 1.20              |
|       |            | 6        | 67             | 9070    | 9300                      | 1.16              |
|       |            | 16       | 99             | 10990   | 13400                     | 1.15              |
| 5     | 7          | 2        | 11             | 3780    | 1670                      | 1.21              |
|       |            | 4        | 48             | 6920    | 6690                      | 1.24              |
|       |            | 6        | 75             | 9060    | 10320                     | 1.21              |
|       |            | 16       | 99             | 10700   | 13300                     | 1.20              |
| 6     | 8          | 2        | 1              | 2280    | 360                       | 1.15              |
|       |            | 4        | 2              | 2610    | 500                       | 1.22              |
|       |            | 6        | 5              | 2670    | 900                       | 1.22              |
|       |            | 16       | 99             | 9630    | 13400                     | 1.28              |
| 7     | 9          | 2        | 0              | 700     | 190                       | 1.03              |
|       |            | 6        | 0              | 710     | 190                       | 1.05              |
|       |            | 20       | 7              | 8940    | 1980                      | 1.33              |

<sup>a</sup>GPC DMAc eluent, PSt equivalents <sup>b</sup> $M_n$  (calc) =  $(([M]_0 - [M]_t)/([RAFT]_0 + d f ([I]_0 (1 - e^{k_d t})))) \times MW_{\text{monomer}} + MW_{\text{RAFT}}$ , (where  $d$  is number of chains formed by radical-radical termination (= 1),  $f$  is the initiator efficiency (= 0.23),  $k_d = 9.6 \times 10^6 \text{ s}^{-1}$  and  $t$  = time in s)

### Preparation of poly(*n*-butyl acrylate)

A stock solution containing cyanomethyl dodecyltrithiocarbonate **3** (60.0 mg), BA (1.79 g, 2.0 mL), AIBN (3.3 mg) and toluene to a volume of 5 mL was prepared in a volumetric flask. The reaction mixture was divided in two and transferred to ampules which were degassed by three repeated freeze–evacuate–thaw cycles and sealed. The ampules were heated at 70 °C for either 2 or 6 h (see Table S3).

**Table S3.** Molar mass and conversion data for PBA using **3** at 70 °C

| Entry | time/h | $M_n$ | $M_n$ theory | $M_w/M_n$ | Conversion (%) |
|-------|--------|-------|--------------|-----------|----------------|
| 1     | 2      | 8260  | 8080         | 1.14      | 85             |
| 2     | 6      | 9000  | 9120         | 1.20      | 96             |

### Preparation of polystyrene

A stock solution containing cyanomethyl dodecyltrithiocarbonate **3** (72.0 mg) and St (4.54 g, 5.0 mL), were prepared in a volumetric flask. The reaction mixture was divided in two and transferred to ampules which were degassed by three repeated freeze–evacuate–thaw cycles and sealed. The ampules were heated at 110 °C for either 6 or 16 h (see Table S4).

**Table S4.** Molar mass and conversion data for PSt using **3** at 110 °C

| Entry | time/h | $M_n$ | $M_n$ theory | $M_w/M_n$ | Conversion (%) |
|-------|--------|-------|--------------|-----------|----------------|
| 1     | 6      | 5040  | 4200         | 1.12      | 25             |
| 2     | 16     | 10600 | 9400         | 1.09      | 47             |

**Figure S1: Apparent transfer coefficient plot of **3** in NVC polymerization**

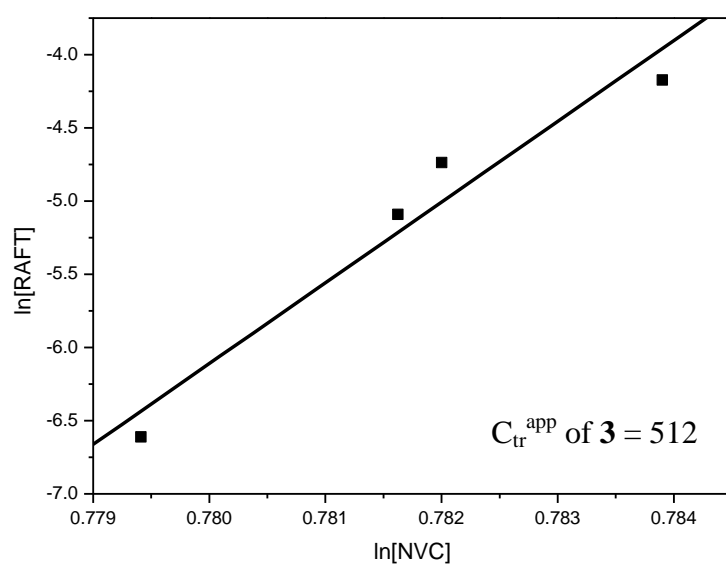

**Figure S2: Pseudo-first order kinetic analysis of NVC conversion with respect to time  
for block extension of 3-PBA**

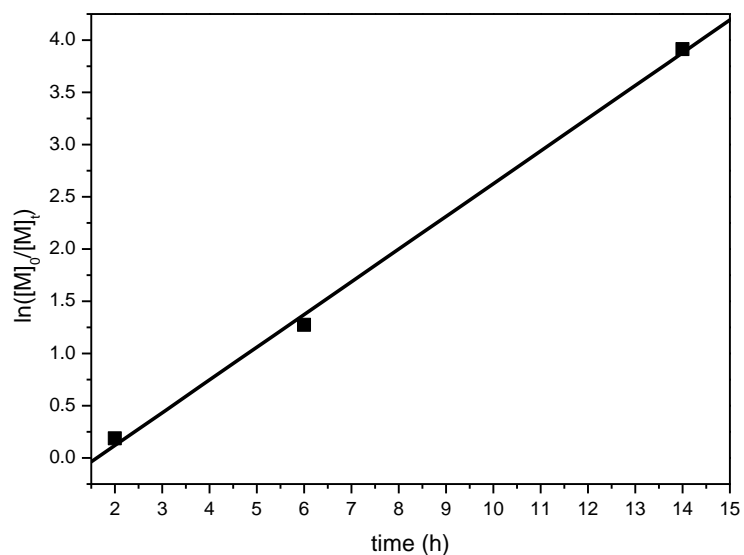

**Figure S3: Pseudo-first order kinetic analysis of NVC conversion with respect to time  
for block extension of 3-PSt**

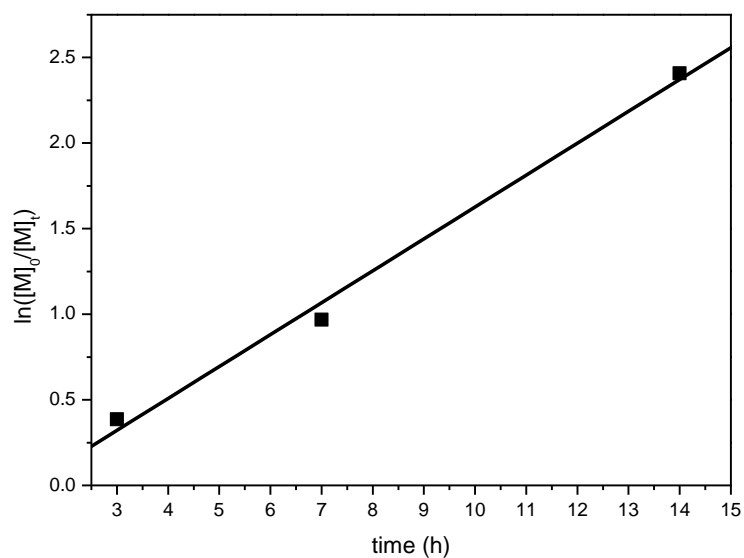

**Figure S4: LCCC analysis of 3-PSt (black) and 3-PNVC (red) near critical conditions  
for PSt on a reversed phase column (18% THF/82%DMF)**

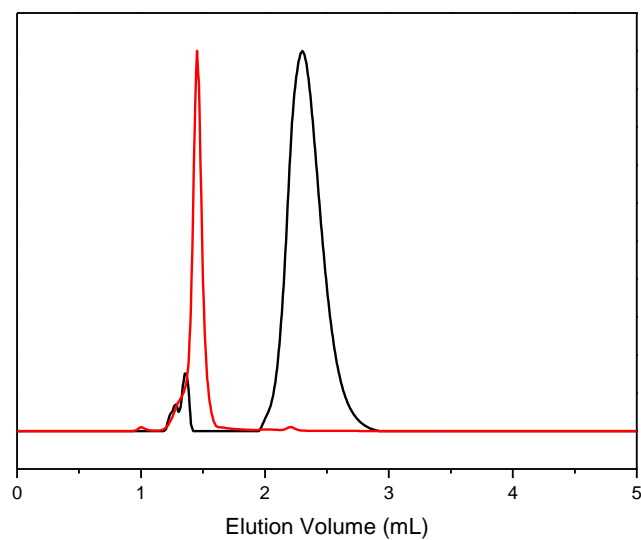

**Figure S5: LCCC analysis of 3-PBA (black) and 3-PNVC (red) near critical conditions  
for PBA on a normal phase column (13% MeCN/87%DCM)**

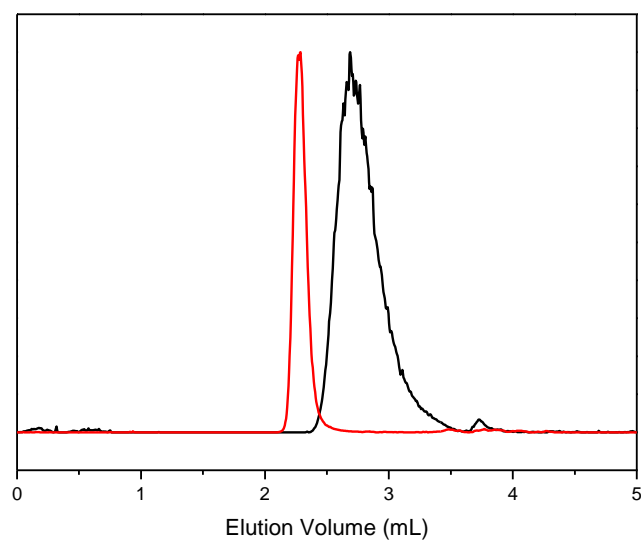

Supplement: c3py00487b.pdf [file c3py00487b.pdf]
